# Supplementary material
Source: PubMed Central journal article supplement (PMC3215063)
Supplement: 1113061108_pnas.201113061SI.pdf [file 1113061108_pnas.201113061SI.pdf]

# Supporting Information

Lacan et al. 10.1073/pnas.1113061108

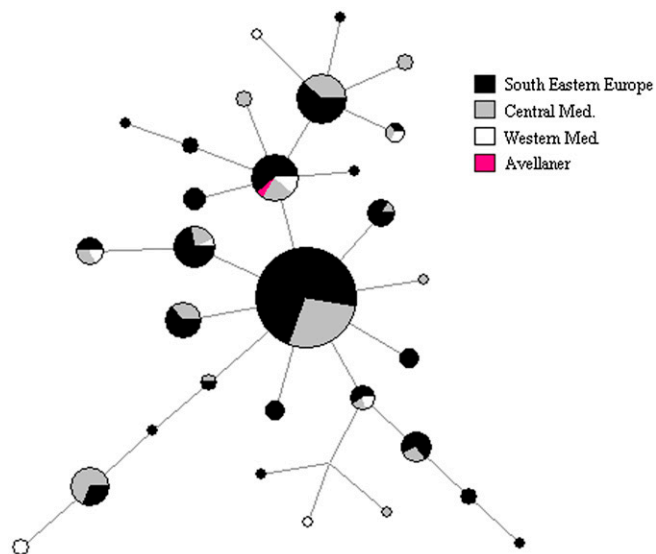

Fig. S1. Median joining network of Y-E1b1b1a1b-V13 haplotypes in current western European populations previously published ( $n = 215$ ) (1–5) and of the Ave07 haplotype.

1. Battaglia V, et al. (2009) Y-chromosomal evidence of the cultural diffusion of agriculture in Southeast Europe. *Eur J Hum Genet* 17:820–830.
2. Caratti S, Gino S, Torre C, Robino C (2009) Subtyping of Y-chromosomal haplogroup E-M78 (E1b1b1a) by SNP assay and its forensic application. *Int J Legal Med* 123:357–360.
3. Di Gaetano C, et al. (2009) Differential Greek and northern African migrations to Sicily are supported by genetic evidence from the Y chromosome. *Eur J Hum Genet* 17:91–99.
4. King RJ, et al. (2011) The coming of the Greeks to Provence and Corsica: Y-chromosome models of archaic Greek colonization of the western Mediterranean. *BMC Evol Biol* 11:69.
5. King RJ, et al. (2008) Differential Y-chromosome Anatolian influences on the Greek and Cretan Neolithic. *Ann Hum Genet* 72:205–214.

**Table S1. Percentage of each ancient mitochondrial haplotype in current European populations**

| Population                       | Total n | 93C, 224C, 311C |                  | CRS            |                  | 126C, 294T, 296T, 304C |                  | 51G, 189C, 270T |                  |
|----------------------------------|---------|-----------------|------------------|----------------|------------------|------------------------|------------------|-----------------|------------------|
|                                  |         | No. shared seq  | Fq haplotype (%) | No. shared seq | Fq haplotype (%) | No. shared seq         | Fq haplotype (%) | No. shared seq  | Fq haplotype (%) |
| <b>Middle East</b>               |         |                 |                  |                |                  |                        |                  |                 |                  |
| Iranians                         | 448     | 1               | 0.22             | 32             | 7.14             | 2                      | 0.45             | 0               | 0.00             |
| Saudi Arabians                   | 702     | 12              | 1.71             | 18             | 2.56             | 0                      | 0.00             | 0               | 0.00             |
| Syrians                          | 118     | 1               | 0.85             | 8              | 6.78             | 2                      | 1.69             | 0               | 0.00             |
| Iraqis                           | 52      | 1               | 1.92             | 0              | 0.00             | 0                      | 0.00             | 0               | 0.00             |
| Druze                            | 356     | 2               | 0.56             | 24             | 6.74             | 0                      | 0.00             | 0               | 0.00             |
| Yemenis                          | 115     | 0               | 0.00             | 3              | 2.61             | 0                      | 0.00             | 0               | 0.00             |
| Kurds                            | 82      | 1               | 1.22             | 12             | 14.63            | 0                      | 0.00             | 0               | 0.00             |
| Dubai                            | 249     | 2               | 0.80             | 4              | 1.61             | 0                      | 0.00             | 0               | 0.00             |
| Palestinians                     | 117     | 1               | 0.85             | 8              | 6.84             | 1                      | 0.85             | 0               | 0.00             |
| Turks                            | 340     | 3               | 0.88             | 33             | 9.71             | 0                      | 0.00             | 0               | 0.00             |
| Middle East: total               | 2,579   | 24              | 0.93             | 142            | 5.51             | 5                      | 0.19             | 0               | 0.00             |
| <b>Caucasus</b>                  |         |                 |                  |                |                  |                        |                  |                 |                  |
| Western Russians                 | 358     | 0               | 0.00             | 45             | 12.57            | 10                     | 2.79             | 0               | 0.00             |
| Other North Caucasus populations | 353     | 4               | 1.13             | 23             | 6.52             | 6                      | 1.70             | 0               | 0.00             |
| Georgians                        | 188     | 6               | 3.19             | 16             | 8.51             | 0                      | 0.00             | 0               | 0.00             |
| Armenians                        | 358     | 2               | 0.56             | 27             | 7.54             | 0                      | 0.00             | 0               | 0.00             |
| Azerbaijanis                     | 48      | 0               | 0.00             | 3              | 6.25             | 1                      | 2.08             | 0               | 0.00             |
| Caucasus: total                  | 1,305   | 12              | 0.92             | 114            | 8.74             | 17                     | 1.30             | 0               | 0.00             |
| <b>Northwestern Europe</b>       |         |                 |                  |                |                  |                        |                  |                 |                  |
| British                          | 100     | 0               | 0.00             | 13             | 13.00            | 1                      | 1.00             | 0               | 0.00             |
| French (Brittany)                | 62      | 0               | 0.00             | 11             | 17.74            | 0                      | 0.00             | 0               | 0.00             |
| French (Normandie)               | 39      | 1               | 2.56             | 2              | 5.13             | 1                      | 2.56             | 0               | 0.00             |
| French (Limousin)                | 72      | 0               | 0.00             | 7              | 9.72             | 3                      | 4.17             | 0               | 0.00             |
| French (Var)                     | 37      | 0               | 0.00             | 8              | 21.62            | 2                      | 5.41             | 0               | 0.00             |
| Welsh                            | 92      | 2               | 2.17             | 23             | 25.00            | 0                      | 0.00             | 0               | 0.00             |
| Cornish                          | 92      | 1               | 1.09             | 16             | 17.39            | 0                      | 0.00             | 3               | 3.26             |
| Irish                            | 300     | 3               | 1.00             | 56             | 18.67            | 6                      | 2.00             | 0               | 0.00             |
| Northwestern Europe: total       | 794     | 7               | 0.88             | 136            | 17.13            | 13                     | 1.64             | 3               | 0.38             |
| <b>North-Central Europe</b>      |         |                 |                  |                |                  |                        |                  |                 |                  |
| Germans                          | 682     | 5               | 0.73             | 96             | 14.08            | 15                     | 2.20             | 8               | 1.17             |
| Danish                           | 38      | 0               | 0.00             | 9              | 23.68            | 2                      | 5.26             | 0               | 0.00             |
| Czechs                           | 262     | 3               | 1.15             | 32             | 12.21            | 1                      | 0.38             | 0               | 0.00             |
| Polish                           | 849     | 6               | 0.71             | 138            | 16.25            | 21                     | 2.47             | 0               | 0.00             |
| Slovakians                       | 335     | 1               | 0.30             | 36             | 10.75            | 4                      | 1.19             | 0               | 0.00             |
| Swiss                            | 224     | 2               | 0.89             | 32             | 14.29            | 5                      | 2.23             | 2               | 0.89             |
| Latvians                         | 299     | 0               | 0.00             | 41             | 13.71            | 13                     | 4.35             | 0               | 0.00             |
| Estonians                        | 149     | 0               | 0.00             | 19             | 12.75            | 3                      | 2.01             | 2               | 1.34             |
| Austrians                        | 99      | 3               | 3.03             | 21             | 21.21            | 1                      | 1.01             | 0               | 0.00             |
| South Tyrol populations          | 263     | 1               | 0.38             | 50             | 19.01            | 3                      | 1.14             | 0               | 0.00             |
| North-Central Europe: total      | 3,200   | 21              | 0.66             | 474            | 14.81            | 68                     | 2.13             | 12              | 0.38             |
| <b>Scandinavia</b>               |         |                 |                  |                |                  |                        |                  |                 |                  |
| Norwegians                       | 626     | 1               | 0.16             | 129            | 20.61            | 16                     | 2.56             | 5               | 0.80             |
| Finns                            | 755     | 2               | 0.26             | 95             | 12.58            | 6                      | 0.79             | 1               | 0.13             |
| Scandinavia: total               | 1,381   | 3               | 0.22             | 224            | 16.22            | 22                     | 1.59             | 6               | 0.43             |
| <b>Southeastern Europe</b>       |         |                 |                  |                |                  |                        |                  |                 |                  |
| Bulgarians                       | 30      | 0               | 0.00             | 3              | 10.00            | 0                      | 0.00             | 0               | 0.00             |
| Hungarians                       | 386     | 5               | 1.30             | 43             | 11.14            | 8                      | 2.07             | 0               | 0.00             |
| Bosnians                         | 304     | 1               | 0.33             | 36             | 11.84            | 2                      | 0.66             | 0               | 0.00             |
| Serbians                         | 56      | 0               | 0.00             | 4              | 7.14             | 0                      | 0.00             | 0               | 0.00             |
| Romanians                        | 105     | 1               | 0.95             | 13             | 12.38            | 0                      | 0.00             | 0               | 0.00             |
| Southeastern Europe: total       | 881     | 7               | 0.79             | 99             | 11.24            | 10                     | 1.14             | 0               | 0.00             |
| <b>Western Mediterranean</b>     |         |                 |                  |                |                  |                        |                  |                 |                  |
| Northern Portuguese              | 271     | 5               | 1.85             | 60             | 22.14            | 3                      | 1.11             | 0               | 0.00             |
| Central Portuguese               | 317     | 7               | 2.21             | 64             | 20.19            | 10                     | 3.15             | 0               | 0.00             |
| Southern Portuguese              | 260     | 0               | 0.00             | 52             | 20.00            | 3                      | 1.15             | 0               | 0.00             |

**Table S1. Cont.**

| Population                   | Total n | 93C, 224C, 311C |                  | CRS            |                  | 126C, 294T, 296T, 304C |                  | 51G, 189C, 270T |                  |
|------------------------------|---------|-----------------|------------------|----------------|------------------|------------------------|------------------|-----------------|------------------|
|                              |         | No. shared seq  | Fq haplotype (%) | No. shared seq | Fq haplotype (%) | No. shared seq         | Fq haplotype (%) | No. shared seq  | Fq haplotype (%) |
| Galicians                    | 135     | 1               | 0.74             | 28             | 20.74            | 2                      | 1.48             | 0               | 0.00             |
| Spanish Catalans             | 133     | 2               | 1.50             | 23             | 17.29            | 0                      | 0.00             | 0               | 0.00             |
| Andalusians                  | 189     | 4               | 2.12             | 36             | 19.05            | 0                      | 0.00             | 0               | 0.00             |
| Balearic islanders           | 67      | 2               | 2.99             | 14             | 20.90            | 0                      | 0.00             | 0               | 0.00             |
| Basque Spanish               | 211     | 1               | 0.47             | 48             | 22.75            | 1                      | 0.47             | 0               | 0.00             |
| Western Mediterranean: total | 1,583   | 22              | 1.39             | 325            | 20.53            | 19                     | 1.20             | 0               | 0.00             |
| Central Mediterranean        |         |                 |                  |                |                  |                        |                  |                 |                  |
| Northern Italians            | 319     | 3               | 0.94             | 45             | 14.11            | 3                      | 0.94             | 0               | 0.00             |
| Central Italians             | 637     | 10              | 1.57             | 96             | 15.07            | 5                      | 0.78             | 0               | 0.00             |
| Central Southern Italians    | 199     | 2               | 1.01             | 35             | 17.59            | 4                      | 2.01             | 0               | 0.00             |
| Sicilians                    | 106     | 0               | 0.00             | 30             | 28.30            | 2                      | 1.89             | 0               | 0.00             |
| Corsicans                    | 99      | 1               | 1.01             | 20             | 20.20            | 1                      | 1.01             | 0               | 0.00             |
| Sardinians                   | 234     | 2               | 0.85             | 52             | 22.22            | 1                      | 0.43             | 0               | 0.00             |
| Slovenians                   | 104     | 1               | 0.96             | 14             | 13.46            | 2                      | 1.92             | 0               | 0.00             |
| Croatians                    | 59      | 1               | 1.69             | 5              | 8.47             | 2                      | 3.39             | 0               | 0.00             |
| Central Mediterranean: total | 1,757   | 20              | 1.14             | 297            | 16.90            | 20                     | 1.14             | 0               | 0.00             |
| Eastern Mediterranean        |         |                 |                  |                |                  |                        |                  |                 |                  |
| Macedonians                  | 237     | 2               | 0.84             | 28             | 11.81            | 5                      | 2.11             | 0               | 0.00             |
| Albanians                    | 84      | 0               | 0.00             | 14             | 16.67            | 1                      | 1.19             | 0               | 0.00             |
| Cretans                      | 200     | 2               | 1.00             | 28             | 14.00            | 11                     | 5.50             | 0               | 0.00             |
| Cypriots                     | 91      | 3               | 3.30             | 8              | 8.79             | 0                      | 0.00             | 0               | 0.00             |
| Greeks                       | 553     | 3               | 0.54             | 57             | 10.31            | 3                      | 0.54             | 2               | 0.36             |
| Eastern Mediterranean: total | 1,165   | 10              | 0.86             | 135            | 11.59            | 20                     | 1.72             | 2               | 0.17             |
| Total                        | 14,645  | 126             | 0.86             | 1946           | 13.29            | 194                    | 1.32             | 23              | 0.16             |

**Table S2. Results of the shared haplotype analysis between Avellaner haplotypes and other ancient Neolithic sequences**

| Culture                             | Location                           | References | Dates         | Positions   | n  | 93C, 224C, 311C (no. shared seq) | CRS (no. shared seq) | 126C, 294T, 296T, 304C (no. shared seq) | 51G, 189C, 270T (no. shared seq) |
|-------------------------------------|------------------------------------|------------|---------------|-------------|----|----------------------------------|----------------------|-----------------------------------------|----------------------------------|
|                                     |                                    |            |               |             |    |                                  |                      |                                         |                                  |
| Gatherer/hunter cultures            | Germany, Russia, Poland, Lithuania | (1)        | 13400–2500 BC | 15997–16409 | 20 | 0                                | 1                    | 0                                       | 0                                |
| Neolithic, LBK/AVK                  | Austria, Hungry, Germany           | (2, 3)     | 5500–500 BC   | 15997–16409 | 42 | 2                                | 4                    | 2                                       | 0                                |
| Neolithic                           | Spain                              | (4)        | 3500–3000 BC  | 16022–16378 | 11 | 0                                | 3                    | 0                                       | 0                                |
| Neolithic, Megalithic               | Western France                     | (5)        | 4200 BC       | 16165–16390 | 3  | 0                                | 0                    | 0                                       | 0                                |
| Late Neolithic, Corded Ware Culture | Germany                            | (6)        | 2700–2400 BC  | 15997–16409 | 9  | 0                                | 0                    | 0                                       | 0                                |
| Late Neolithic, Treilles Culture    | France                             | (7)        | 3030–2890 BC  | 16009–16390 | 29 | 0                                | 6                    | 2                                       | 0                                |
| Chalcolithic                        | Austria/Italy                      | (8)        | 3500–3100 BC  | 16040–16401 | 1  | 0                                | 0                    | 0                                       | 0                                |

- Bramanti B, et al. (2009) Genetic discontinuity between local hunter-gatherers and central Europe's first farmers. *Science* 326:137–140.
- Haak W, et al.; Members of the Genographic Consortium (2010) Ancient DNA from European early neolithic farmers reveals their near eastern affinities. *PLoS Biol* 8:e1000536.
- Haak W, et al. (2005) Ancient DNA from the first European farmers in 7500-year-old Neolithic sites. *Science* 310:1016–1018.
- Sampietro ML, et al. (2007) Palaeogenetic evidence supports a dual model of Neolithic spreading into Europe. *Proc Biol Sci* 274:2161–2167.
- Deguiloux MF, et al. (2010) News from the west: Ancient DNA from a French megalithic burial chamber. *Am J Phys Anthropol* 144:108–118.
- Haak W, et al. (2008) Ancient DNA, Strontium isotopes, and osteological analyses shed light on social and kinship organization of the Later Stone Age. *Proc Natl Acad Sci USA* 105:18226–18231.
- Lacan M, et al. (2011) Ancient DNA reveals male diffusion through the Neolithic Mediterranean route. *Proc Natl Acad Sci USA* 108:9788–9791.
- Endicott P, et al. (2009) Genotyping human ancient mtDNA control and coding region polymorphisms with a multiplexed Single-Base-Extension assay: The singular maternal history of the Tyrolean Iceman. *BMC Genet* 10:29.

**Table S3. Percentage of each ancient Y-haplotype in current European populations**

| Population (size)            | No. profiles  | G2a                  |                  | E1b1b1a1b             |                  |
|------------------------------|---------------|----------------------|------------------|-----------------------|------------------|
|                              |               | No. shared haplotype | Fq haplotype (%) | No. shared haplotype* | Fq haplotype (%) |
| <b>Middle East</b>           |               |                      |                  |                       |                  |
| Iranians                     | 340           | 0                    | 0                | 1                     | 0.29             |
| Syrians                      | 161           | 0                    | 0                | 0                     | 0                |
| Druze                        | 283           | 0                    | 0                | 38                    | 13.43            |
| Palestinians                 | 364           | 0                    | 0                | 2                     | 0.55             |
| Lebanese                     | 577           | 2                    | 0.35             | 14                    | 2.43             |
| Turks                        | 663           | 1                    | 0.15             | 17                    | 2.56             |
| Middle East: total           | 2,388         | 3                    | 0.13             | 72                    | 3.02             |
| <b>Caucasus</b>              |               |                      |                  |                       |                  |
| Georgians                    | 77            | 0                    | 0                | 0                     | 0                |
| Armenians                    | 100           | 0                    | 0                | 0                     | 0                |
| Azerbaijanis                 | 119           | 0                    | 0                | 7                     | 5.88             |
| Caucasus: total              | 296           | 0                    | 0                | 7                     | 2.36             |
| <b>Northwestern Europe</b>   |               |                      |                  |                       |                  |
| French                       | 100           | 0                    | 0                | 0                     | 0                |
| Irish                        | 155           | 0                    | 0                | 0                     | 0                |
| Belgians                     | 113           | 0                    | 0                | 0                     | 0                |
| Dutch                        | 72            | 0                    | 0                | 0                     | 0                |
| Northwestern Europe: total   | 440           | 0                    | 0                | 0                     | 0                |
| <b>North-central Europe</b>  |               |                      |                  |                       |                  |
| Germans                      | 1,414         | 2                    | 0.14             | 3                     | 0.21             |
| Danish                       | 185           | 0                    | 0                | 0                     | 0                |
| Czechs                       | 1,750         | 6                    | 0.34             | 4                     | 0.23             |
| Polish                       | 208           | 0                    | 0                | 1                     | 0.48             |
| Eastern Slovaks              | 629           | 0                    | 0                | 6                     | 0.95             |
| Swiss (Zurich area)          | 150           | 0                    | 0                | 0                     | 0                |
| North-central Europe: total  | 4,336         | 8                    | 0.18             | 14                    | 0.32             |
| <b>Scandinavia</b>           |               |                      |                  |                       |                  |
| Norwegians                   | 1,766         | 0                    | 0                | 0                     | 0                |
| Swedish                      | 708           | 1                    | 0.14             | 1                     | 0.14             |
| Scandinavia: total           | 2,474         | 1                    | 0.04             | 1                     | 0.04             |
| <b>Southeastern Europe</b>   |               |                      |                  |                       |                  |
| Hungarians                   | 215           | 1                    | 0.47             | 2                     | 0.93             |
| Bosnians Herzegovinians      | 181           | 0                    | 0                | 2                     | 1.10             |
| Serbians                     | 179           | 0                    | 0                | 4                     | 2.23             |
| Montenegrins                 | 404           | 1                    | 0.25             | 61                    | 15.10            |
| Southeastern Europe: total   | 979           | 2                    | 0.20             | 69                    | 7.05             |
| <b>Western Mediterranean</b> |               |                      |                  |                       |                  |
| Northern Portuguese          | 235           | 0                    | 0                | 1                     | 0.43             |
| Southern Portuguese          | 78            | 0                    | 0                | 0                     | 0                |
| Northwestern Spanish         | 239           | 0                    | 0                | 0                     | 0                |
| Northeastern Spanish         | 114           | 0                    | 0                | 0                     | 0                |
| Southern Spanish             | 168           | 1                    | 0.60             | 0                     | 0                |
| Balearic islanders           | 340           | 0                    | 0                | 2                     | 0.59             |
| Central Spanish              | 188           | 1                    | 0.53             | 0                     | 0                |
| Basque Spanish               | 115           | 0                    | 0                | 0                     | 0                |
| Western Mediterranean: total | 1,477         | 2                    | 0.14             | 3                     | 0.20             |
| <b>Central Mediterranean</b> |               |                      |                  |                       |                  |
| Northern Italians            | 155           | 2                    | 1.29             | 0                     | 0                |
| Southern Italians            | 193           | 0                    | 0                | 3                     | 1.55             |
| Sicilians                    | 491           | 1                    | 0.20             | 1                     | 0.20             |
| Sardinians                   | 100           | 0                    | 0                | 0                     | 0                |
| Croatians                    | 200           | 2                    | 1                | 0                     | 0                |
| Central Mediterranean: total | 1,139         | 5                    | 0.44             | 4                     | 0.35             |
| <b>Eastern Mediterranean</b> |               |                      |                  |                       |                  |
| Maltese                      | 50            | 0                    | 0                | 0                     | 0                |
| Cretans                      | 71            | 0                    | 0                | 0                     | 0                |
| Cypriots                     | 163           | 0                    | 0                | 1                     | 0.61             |
| Northern Greeks              | 183           | 0                    | 0                | 5                     | 1.79             |
| Central and southern Greeks  | 73            | 0                    | 0                | 0                     | 0                |
| Eastern Mediterranean: total | 637           | 0                    | 0                | 6                     | 0.94             |
| <b>Total</b>                 | <b>14,166</b> | <b>42</b>            | <b>0.30</b>      | <b>346</b>            | <b>2.44</b>      |

\*All these shared haplotypes were assigned to E1b1b haplogroup thanks to the haplogroup predictor software (1) or were previously described as belonging to E1b1b1a2 or to E1b1b1c haplogroups.

1. Athey W (2005) Haplogroup prediction from Y-STR values using an allele-frequency approach. *J Genet Geneal* 1:1–7.



Table S4. Cont.

| Population (size)         | No. seq | References HVS-I     | Population (size)           | No. profiles | References Y-STRs |
|---------------------------|---------|----------------------|-----------------------------|--------------|-------------------|
| Central Southern Italians | 199     | (90)                 | Southern Italians           | 193          | (82)              |
| Sicilians                 | 106     | (91)                 | Sicilians                   | 491          | (92, 93)          |
| Corsicans                 | 99      | (94, 95)             |                             |              |                   |
| Sardinians                | 234     | (81, 96, 97)         | Sardinians                  | 100          | (98)              |
| Slovenians                | 104     | (69)                 |                             |              |                   |
| Croatians                 | 59      | (68)                 | Croatians                   | 200          | (99)              |
| Eastern Mediterranean     |         |                      |                             |              |                   |
| Macedonians               | 237     | (72, 100)            |                             |              |                   |
| Albanians                 | 84      | (72, 101)            |                             |              |                   |
|                           |         |                      | Maltese                     | 50           | (9)               |
| Cretans                   | 200     | (8, 102)             | Cretans                     | 71           | (103)             |
| Cypriots                  | 91      | (104)                | Cypriots                    | 163          | (9)               |
| Greeks                    | 553     | (2, 8, 72, 104, 105) | Northern Greeks             | 280          | (106, 107)        |
|                           |         |                      | Central and southern Greeks | 73           | (103)             |

- Metspalu M, et al. (2004) Most of the extant mtDNA boundaries in south and southwest Asia were likely shaped during the initial settlement of Eurasia by anatomically modern humans. *BMC Genet* 5:26.
- Richards M, et al. (2000) Tracing European founder lineages in the Near Eastern mtDNA pool. *Am J Hum Genet* 67:1251–1276.
- Roewer L, Willuweit S, Stoneking M, Nasidze I (2009) A Y-STR database of Iranian and Azerbaijani minority populations. *Forensic Sci Int Genet* 4:e53–e55.
- Nasidze I, Schädlich H, Stoneking M (2003) Haplotypes from the Caucasus, Turkey and Iran for nine Y-STR loci. *Forensic Sci Int* 137:85–93.
- Abu-Amero KK, González AM, Larruga JM, Bosley TM, Cabrera VM (2007) Eurasian and African mitochondrial DNA influences in the Saudi Arabian population. *BMC Evol Biol* 7:32.
- Abu-Amero KK, Larruga JM, Cabrera VM, González AM (2008) Mitochondrial DNA structure in the Arabian Peninsula. *BMC Evol Biol* 8:45.
- Di Rienzo A, Wilson AC (1991) Branching pattern in the evolutionary tree for human mitochondrial DNA. *Proc Natl Acad Sci USA* 88:1597–1601.
- Vernei C, et al. (2001) Genetic characterization of the body attributed to the evangelist Luke. *Proc Natl Acad Sci USA* 98:13460–13463.
- Zalloua PA, et al.; Genographic Consortium (2008) Identifying genetic traces of historical expansions: Phoenician footprints in the Mediterranean. *Am J Hum Genet* 83:633–642.
- Al-Zahery N, et al. (2003) Y-chromosome and mtDNA polymorphisms in Iraq, a crossroad of the early human dispersal and of post-Neolithic migrations. *Mol Phylogenet Evol* 28:458–472.
- Macaulay V, et al. (1999) The emerging tree of West Eurasian mtDNAs: A synthesis of control-region sequences and RFLPs. *Am J Hum Genet* 64:232–249.
- Shlush LI, et al. (2008) The Druze: A population genetic refugium of the Near East. *PLoS ONE* 3:e2105.
- Kivisild T, et al. (2004) Ethiopian mitochondrial DNA heritage: Tracking gene flow across and around the gate of tears. *Am J Hum Genet* 75:752–770.
- Comas D, Calafell F, Bendukidze N, Fañanás L, Bertranpetit J (2000) Georgian and kurd mtDNA sequence analysis shows a lack of correlation between languages and female genetic lineages. *Am J Phys Anthropol* 112:5–16.
- Alshamali F, Brandstätter A, Zimmermann B, Parson W (2008) Mitochondrial DNA control region variation in Dubai, United Arab Emirates. *Forensic Sci Int Genet* 2:e9–e10.
- Zalloua PA, et al.; Genographic Consortium (2008) Y-chromosomal diversity in Lebanon is structured by recent historical events. *Am J Hum Genet* 82:873–882.
- Calafell F, Underhill P, Tolun A, Angelicheva D, Kalaydjieva L (1996) From Asia to Europe: Mitochondrial DNA sequence variability in Bulgarians and Turks. *Ann Hum Genet* 60:35–49.
- Comas D, Calafell F, Mateu E, Pérez-Lezaun A, Bertranpetit J (1996) Geographic variation in human mitochondrial DNA control region sequence: The population history of Turkey and its relationship to the European populations. *Mol Biol Evol* 13:1067–1077.
- Di Benedetto G, et al. (2001) DNA diversity and population admixture in Anatolia. *Am J Phys Anthropol* 115:144–156.
- Quintana-Murci L, et al. (2004) Where west meets east: The complex mtDNA landscape of the southwest and Central Asian corridor. *Am J Hum Genet* 74:827–845.
- Alakoc YD, et al. (2010) Y-chromosome and autosomal STR diversity in four proximate settlements in Central Anatolia. *Forensic Sci Int Genet* 4:e135–e137.
- Cinnioğlu C, et al. (2004) Excavating Y-chromosome haplotype strata in Anatolia. *Hum Genet* 114:127–148.
- Grzybowski T, et al. (2007) Complex interactions of the Eastern and Western Slavic populations with other European groups as revealed by mitochondrial DNA analysis. *Forensic Sci Int Genet* 1:141–147.
- Malyarchuk BA, et al. (2002) Mitochondrial DNA variability in Poles and Russians. *Ann Hum Genet* 66:261–283.
- Lebedeva IA, Seryogin YA, Poltarauk AB Mitochondrial DNA polymorphism in Adygeis. Available at: <http://www.ncbi.nlm.nih.gov/nuccore> (accession numbers AF285277–AF285384) Accessed September 2011.
- Reidla M Mitochondrial DNA lineages in Georgia. Available at: <http://www.ncbi.nlm.nih.gov/nuccore> (accession numbers AJ389196–AJ389375) Accessed September, 2011.
- Metspalu E, et al. Lineages and the history of the Roms (Gypsies). Available at: <http://www.ncbi.nlm.nih.gov/nuccore> [accession numbers AJ233203–AJ233348 and AJ240164–AJ240248 (Armenians and Slovaks) Accessed September, 2011].
- Piercy R, Sullivan KM, Benson N, Gill P (1993) The application of mitochondrial DNA typing to the study of white Caucasian genetic identification. *Int J Legal Med* 106:85–90.
- Dubut V, et al. (2004) mtDNA polymorphisms in five French groups: Importance of regional sampling. *Eur J Hum Genet* 12:293–300.
- Keyser-Tracqui C, Ricaut FX, Blandin P, Ludes B (2003) French allele frequencies and haplotypes of nine Y-specific STRs. *J Forensic Sci* 48:242–244.
- Richards M, et al. (1996) Paleolithic and Neolithic lineages in the European mitochondrial gene pool. *Am J Hum Genet* 59:185–203.
- McEvoy B, Richards M, Forster P, Bradley DG (2004) The Longue Durée of genetic ancestry: Multiple genetic marker systems and Celtic origins on the Atlantic facade of Europe. *Am J Hum Genet* 75:693–702.
- Ballard DJ, Phillips C, Thacker CR, Court DS (2006) Y chromosome STR haplotype data for an Irish population. *Forensic Sci Int* 161:64–68.
- De Maesschalck K, et al. (2005) Y-chromosomal STR haplotypes in a Belgian population sample and identification of a micro-variant with a flanking site mutation at DYS19. *Forensic Sci Int* 152:89–94.
- Rodig H, et al. (2008) Evaluation of haplotype discrimination capacity of 35 Y-chromosomal short tandem repeat loci. *Forensic Sci Int* 174:182–188.
- Baasner A, Schäfer C, Junge A, Madea B (1998) Polymorphic sites in human mitochondrial DNA control region sequences: Population data and maternal inheritance. *Forensic Sci Int* 98:169–178.
- Brandstätter A, Klein R, Duftner N, Wiegand P, Parson W (2006) Application of a quasi-median network analysis for the visualization of character conflicts to a population sample of mitochondrial DNA control region sequences from southern Germany (Ulm). *Int J Legal Med* 120:310–314.
- Hofmann S, et al. (1997) Population genetics and disease susceptibility: Characterization of central European haplogroups by mtDNA gene mutations, correlation with D loop variants and association with disease. *Hum Mol Genet* 6:1835–1846.
- Lutz S, Weisser HJ, Heizmann J, Pollak S (1998) Location and frequency of polymorphic positions in the mtDNA control region of individuals from Germany. *Int J Legal Med* 111:67–77.
- Pfeiffer H, et al. (1999) Expanding the forensic German mitochondrial DNA control region database: Genetic diversity as a function of sample size and microgeography. *Int J Legal Med* 112:291–298.
- Hohoff C, et al. (2007) Y-chromosomal microsatellite mutation rates in a population sample from northwestern Germany. *Int J Legal Med* 121:359–363.
- Hallenberg C, Nielsen K, Simonsen B, Sanchez J, Morling N (2005) Y-chromosome STR haplotypes in Danes. *Forensic Sci Int* 155:205–210.
- Malyarchuk BA, Vanecsek T, Perkova MA, Derenko MV, Sip M (2006) Mitochondrial DNA variability in the Czech population, with application to the ethnic history of Slavs. *Hum Biol* 78:681–696.
- Zastera J, et al. (2010) Assembly of a large Y-STR haplotype database for the Czech population and investigation of its substructure. *Forensic Sci Int Genet* 4:e75–e78.
- Rebala K, Szczerkowska Z (2005) Polish population study on Y chromosome haplotypes defined by 18 STR loci. *Int J Legal Med* 119:303–305.
- Malyarchuk BA, et al. (2008) Mitochondrial DNA variability in Slovaks, with application to the Roma origin. *Ann Hum Genet* 72:228–240.
- Petrejčíková E, et al. (2011) Allele frequencies and population data for 11 Y-chromosome STRs in samples from Eastern Slovakia. *Forensic Sci Int Genet* 5:e53–e62.
- Dimo-Simonin N, Grange F, Taroni F, Brandt-Casadevall C, Mangin P (2000) Forensic evaluation of mtDNA in a population from south west Switzerland. *Int J Legal Med* 113:89–97.

49. Pult I, et al. (1994) Mitochondrial DNA sequences from Switzerland reveal striking homogeneity of European populations. *Biol Chem Hoppe Seyler* 375:837–840.
50. Haas C, Wangenstein T, Giezenlander N, Kratzer A, Bär W (2006) Y-chromosome STR haplotypes in a population sample from Switzerland (Zurich area). *Forensic Sci Int* 158:213–218.
51. Pliss L, et al. (2006) Mitochondrial DNA portrait of Latvians: Towards the understanding of the genetic structure of Baltic-speaking populations. *Ann Hum Genet* 70:439–458.
52. Sajantila A, et al. (1995) Genes and languages in Europe: An analysis of mitochondrial lineages. *Genome Res* 5:42–52.
53. Sajantila A, et al. (1996) Paternal and maternal DNA lineages reveal a bottleneck in the founding of the Finnish population. *Proc Natl Acad Sci USA* 93:12035–12039.
54. Parson W, Parsons TJ, Scheithauer R, Holland MM (1998) Population data for 101 Austrian Caucasian mitochondrial DNA d-loop sequences: Application of mtDNA sequence analysis to a forensic case. *Int J Legal Med* 111:124–132.
55. Thomas MG, et al. (2008) New genetic evidence supports isolation and drift in the Ladin communities of the South Tyrolean Alps but not an ancient origin in the Middle East. *Eur J Hum Genet* 16:124–134.
56. Helgason A, et al. (2001) mtDNA and the islands of the North Atlantic: Estimating the proportions of Norse and Gaelic ancestry. *Am J Hum Genet* 68:723–737.
57. Opdal SH, et al. (1998) Increased number of substitutions in the D-loop of mitochondrial DNA in the sudden infant death syndrome. *Acta Paediatr* 87:1039–1044.
58. Passarino G, et al. (2002) Different genetic components in the Norwegian population revealed by the analysis of mtDNA and Y chromosome polymorphisms. *Eur J Hum Genet* 10:521–529.
59. Dupuy BM, et al. (2001) Y-chromosome variation in a Norwegian population sample. *Forensic Sci Int* 117:163–173.
60. Kittles RA, et al. (1999) Autosomal, mitochondrial, and Y chromosome DNA variation in Finland: Evidence for a male-specific bottleneck. *Am J Phys Anthropol* 108:381–399.
61. Meiniilä M, Finnilä S, Majamaa K (2001) Evidence for mtDNA admixture between the Finns and the Saami. *Hum Hered* 52:160–170.
62. Hedman M, et al. (2007) Finnish mitochondrial DNA HVS-I and HVS-II population data. *Forensic Sci Int* 172:171–178.
63. Holmlund G, Nilsson H, Karlsson A, Lindblom B (2006) Y-chromosome STR haplotypes in Sweden. *Forensic Sci Int* 160:66–79.
64. Bogácsi-Szabó E, et al. (2005) Mitochondrial DNA of ancient Cumanians: Culturally Asian steppe nomadic immigrants with substantially more western Eurasian mitochondrial DNA lineages. *Hum Biol* 77:639–662.
65. Irwin J, et al. (2007) Hungarian mtDNA population databases from Budapest and the Baranya county Roma. *Int J Legal Med* 121:377–383.
66. Tömöry G, et al. (2007) Comparison of maternal lineage and biogeographic analyses of ancient and modern Hungarian populations. *Am J Phys Anthropol* 134:354–368.
67. Völgyi A, Zalán A, Szvetnik E, Pamjav H (2009) Hungarian population data for 11 Y-STR and 49 Y-SNP markers. *Forensic Sci Int Genet* 3:e27–e28.
68. Harvey M, Gordon K, Owens K, Lee M King MC MtDNA sequences from Balkan populations. Available at: <http://www.ncbi.nlm.nih.gov/nucleotide> [accession numbers AY005666–AY005724 (Croatsians), AY005729–AY005784 (Serbians), and AY005485–AY005644 (Bosnians) Accessed September, 2011].
69. Malyarchuk BA, et al. (2003) Mitochondrial DNA variability in Bosnians and Slovenians. *Ann Hum Genet* 67:412–425.
70. Klarić IM, et al. (2005) Evaluation of Y-STR variation in Bosnian and Herzegovinian population. *Forensic Sci Int* 154:252–256.
71. Mirabal S, et al. (2010) Human Y-chromosome short tandem repeats: A tale of acculturation and migrations as mechanisms for the diffusion of agriculture in the Balkan Peninsula. *Am J Phys Anthropol* 142:380–390.
72. Bosch E, et al. (2006) Paternal and maternal lineages in the Balkans show a homogeneous landscape over linguistic barriers, except for the isolated Aromuns. *Ann Hum Genet* 70:459–487.
73. Pereira L, Cunha C, Amorim A (2004) Predicting sampling saturation of mtDNA haplotypes: An application to an enlarged Portuguese database. *Int J Legal Med* 118:132–136.
74. González AM, et al. (2003) Mitochondrial DNA affinities at the Atlantic fringe of Europe. *Am J Phys Anthropol* 120:391–404.
75. Adams SM, et al. (2008) The genetic legacy of religious diversity and intolerance: Paternal lineages of Christians, Jews, and Muslims in the Iberian Peninsula. *Am J Hum Genet* 83:725–736.
76. Pontes ML, Caine L, Abrantes D, Lima G, Pinheiro MF (2007) Allele frequencies and population data for 17 Y-STR loci (AmpFISTR Y-filer) in a Northern Portuguese population sample. *Forensic Sci Int* 170:62–67.
77. Salas A, Comas D, Lareu MV, Bertranpetit J, Carracedo A (1998) mtDNA analysis of the Galician population: A genetic edge of European variation. *Eur J Hum Genet* 6:365–375.
78. Corte-Real HB, et al. (1996) Genetic diversity in the Iberian Peninsula determined from mitochondrial sequence analysis. *Ann Hum Genet* 60:331–350.
79. Crespiello M, et al. (2000) Mitochondrial DNA sequences for 118 individuals from northeastern Spain. *Int J Legal Med* 114:130–132.
80. Casas MJ, Hagelberg E, Fregel R, Larruga JM, González AM (2006) Human mitochondrial DNA diversity in an archaeological site in al-Andalus: genetic impact of migrations from North Africa in medieval Spain. *Am J Phys Anthropol* 131:539–551.
81. Falchi A, et al. (2006) Genetic history of some western Mediterranean human isolates through mtDNA HVR1 polymorphisms. *J Hum Genet* 51:9–14.
82. Rodríguez V, et al. (2009) Genetic sub-structure in western Mediterranean populations revealed by 12 Y-chromosome STR loci. *Int J Legal Med* 123:137–141.
83. Alfonso-Sánchez MA, et al. (2008) Mitochondrial DNA haplogroup diversity in Basques: A reassessment based on HVI and HVII polymorphisms. *Am J Hum Biol* 20:154–164.
84. Bertranpetit J, et al. (1995) Human mitochondrial DNA variation and the origin of Basques. *Ann Hum Genet* 59:63–81.
85. Mogentale-Profizi N, et al. (2001) Mitochondrial DNA sequence diversity in two groups of Italian Veneto speakers from Veneto. *Ann Hum Genet* 65:153–166.
86. Turchi C, et al.; Ge.F.I. Group (2008) Italian mitochondrial DNA database: Results of a collaborative exercise and proficiency testing. *Int J Legal Med* 122:199–204.
87. Turrina S, Atzei R, De Leo D (2006) Y-chromosomal STR haplotypes in a Northeast Italian population sample using 17plex loci PCR assay. *Int J Legal Med* 120:56–59.
88. Achilli A, et al. (2007) Mitochondrial DNA variation of modern Tuscans supports the near eastern origin of Etruscans. *Am J Hum Genet* 80:759–768.
89. Francalacci P, Bertranpetit J, Calafell F, Underhill PA (1996) Sequence diversity of the control region of mitochondrial DNA in Tuscany and its implications for the peopling of Europe. *Am J Phys Anthropol* 100:443–460.
90. Babalini C, et al. (2005) The population history of the Croatian linguistic minority of Molise (southern Italy): A maternal view. *Eur J Hum Genet* 13:902–912.
91. Cali F, et al. (2001) MtDNA control region and RFLP data for Sicily and France. *Int J Legal Med* 114:229–231.
92. Di Gaetano C, et al. (2009) Differential Greek and northern African migrations to Sicily are supported by genetic evidence from the Y chromosome. *Eur J Hum Genet* 17:91–99.
93. Robino C, et al. (2006) Y-chromosomal STR haplotypes in Sicily. *Forensic Sci Int* 159:235–240.
94. Varesi L, et al. (2000) Mitochondrial control-region sequence variation in the Corsican population, France. *Am J Hum Biol* 12:339–351.
95. Giovannoni L, Varesi L, Piras I, Moral P, Vona G (2005) Mitochondrial DNA polymorphism in the HVRI control region in the population of South Corsica (France). Available at: <http://www.ncbi.nlm.nih.gov/nucleotide> (accession numbers DQ081367–DQ081419) Accessed September, 2011.
96. Calo CM, Varesi L, Giovannoni L, Vona G, Falchi A (2005) Mitochondrial DNA polymorphism in the HVRI control region in the population of Sardinia (Trexenta). Available at: <http://www.ncbi.nlm.nih.gov/nucleotide> (accession numbers DQ081669–DQ181715) Accessed September, 2011.
97. Varesi L (2005) Mitochondrial DNA polymorphism in Sardinian populations. Available at: <http://www.ncbi.nlm.nih.gov/nucleotide> (accession numbers DQ067827–DQ067877, DQ081564–DQ081607, DQ081420–DQ081469) Accessed September, 2011.
98. Ghiani ME, et al. (2009) Population data for Y-chromosome haplotypes defined by AmpFISTR Yfiler PCR amplification kit in North Sardinia (Italy). *Coll Antropol* 33:643–651.
99. Haliti N, et al. (2009) Evaluation of population variation at 17 autosomal STR and 16 Y-STR haplotype loci in Croatsians. *Forensic Sci Int Genet* 3:e137–e138.
100. Zimmermann B, et al. (2007) Mitochondrial DNA control region population data from Macedonia. *Forensic Sci Int Genet* 1:e4–e9.
101. Belledi M, et al. (2000) Maternal and paternal lineages in Albania and the genetic structure of Indo-European populations. *Eur J Hum Genet* 8:480–486.
102. Villemers R *Homo sapiens* Mitochondrial DNA D-Loop HVR1 sequence. Available at: <http://www.ncbi.nlm.nih.gov/nucleotide> (accession numbers AJ274757–AJ274942) Accessed September, 2011.
103. King RJ, et al. (2008) Differential Y-chromosome Anatolian influences on the Greek and Cretan Neolithic. *Ann Hum Genet* 72:205–214.
104. Irwin J, et al. (2008) Mitochondrial control region sequences from northern Greece and Greek Cypriots. *Int J Legal Med* 122:87–89.
105. Kouvatzi A, Karaiskou N, Apostolidis A, Kirmizidis G (2001) Mitochondrial DNA sequence variation in Greeks. *Hum Biol* 73:855–869.
106. Kovatsi L, Saunier JL, Irwin JA (2009) Population genetics of Y-chromosome STRs in a population of Northern Greeks. *Forensic Sci Int Genet* 4:e21–e22.
107. King RJ, et al. (2011) The coming of the Greeks to Provence and Corsica: Y-chromosome models of archaic Greek colonization of the western Mediterranean. *BMC Evol Biol* 11:69.
